# Supplementary material for: An Endogenous Foamy-like Viral Element in the Coelacanth Genome
Source: PubMed Central journal article supplement (PMC3386198; doi:10.1371/journal.ppat.1002790), 2012-06-28
Supplement: ppat.1002790.s010.pdf [file ppat.1002790.s010.pdf]

```

CoeEFV_consensus ATGTATGGTCAAATAAATAACAATTGACTAATGAGACAGTTTGAATCCAGATAGAGAGCCCTTGCATCAATAAATACTAATCTAAT
contig270160 ATGTATGGTCAAATAAATAACAATTGACTAATGAGACAGTTTGAATCCAGATAGAGAGCCCTTGCATCAATAAATACTAATCTAAT
contig184752 ATGTATGGTCAAATAAATAACAATTGACTAATGAGACAGTTTGAATCCAGATAGAGAGCCCTTGCATCAATAAATACTAATCTAAT
contig185880 ATGTATGGTCAAATAAATAACAATTGACTAATGAGACAGTTTGAATCCAGATAGAGAGCCCTTGCATCAATAAATACTAATCTAAT
contig245863 ATGTATGGTCAAATAAATAACAATTGACTAATGAGACAGTTTGAATCCAGATAGAGAGCCCTTGCATCAATAAATACTAATCTAAT
contig236769 ATGTATGGTCAAATAAATAACAATTGACTAATGAGACAGTTTGAATCCAGATAGAGAGCCCTTGCATCAATAAATACTAATCTAAT

CoeEFV_consensus ATTCAAACAGCCCTAATCACCAATAGAGATAACAGAGCATACCAAGTGTATTGATGACCAATCCAGACCATCCACACACAGTACACAGTACCATGTCTGATATA
contig243355 ATTCAAACAGCCCTAATCACCAATAGAGATAACAGAGCATACCAAGTGTATTGATGACCAATCCAGACCATCCACACACAGTACACAGTACCATGTCTGATATA
contig219087 ATTCAAACAGCCCTAATCACCAATAGAGATAACAGAGCATACCAAGTGTATTGATGACCAATCCAGACCATCCACACACAGTACACAGTACCATGTCTGATATA

```

**Figure S4.** Alignment of the two sets of sequences used for dating CoEFV invasion. Flanking sequences are shown for each sequence set with consensus genomic sequence of CoeEFV.
