# Supplementary material for: An Endogenous Foamy-like Viral Element in the Coelacanth Genome
Source: PubMed Central journal article supplement (PMC3386198; doi:10.1371/journal.ppat.1002790), 2012-06-28
Supplement: ppat.1002790.s014.pdf [file ppat.1002790.s014.pdf]

**Table S2. The matching contigs identified in coelacanth genome**

| Contig Number | Genomic Regions Represent    |
|---------------|------------------------------|
| contig243355  | 5'LTR- <i>gag-pol</i>        |
| contig219087  | 5'LTR- <i>gag-pol</i>        |
| contig210236  | 5'LTR- <i>gag-pol</i>        |
| contig187426  | <i>gag-pol</i>               |
| contig036414  | 5'LTR- <i>gag-pol</i>        |
| contig236767  | 5'LTR- <i>gag-pol</i>        |
| contig184753  | 5'LTR- <i>gag-pol</i>        |
| contig185881  | <i>gag-pol</i>               |
| contig184751  | <i>env</i> -ORF1/2           |
| contig187425  | <i>pol-env</i> -ORF1/2-3'LTR |
| contig274525  | 5LTR- <i>gag</i>             |
| contig178313  | <i>pol-env</i>               |
| contig247568  | <i>pol</i>                   |
| contig270160  | <i>pol</i>                   |
| contig184752  | <i>pol</i>                   |
| contig236768  | <i>pol</i>                   |
| contig185880  | <i>pol</i>                   |
| contig279762  | <i>pol-env</i> -ORF1/2       |
| contig245863  | <i>pol</i>                   |
| contig236769  | <i>pol</i>                   |
| contig281509  | <i>pol-env</i> -ORF1/2       |
| contig241846  | <i>env</i> -ORF1/2           |
| contig111507  | <i>env</i> -ORF1/2           |
| contig236770  | <i>env</i> -ORF1/2           |
