# Supplementary material for: An Endogenous Foamy-like Viral Element in the Coelacanth Genome
Source: PLOS journal article supplement (doi:10.1371/journal.ppat.1002790), 2012-06-28
Supplement: S7 (10.1371/journal.ppat.1002790.s007) [file journal.ppat.1002790.s007]

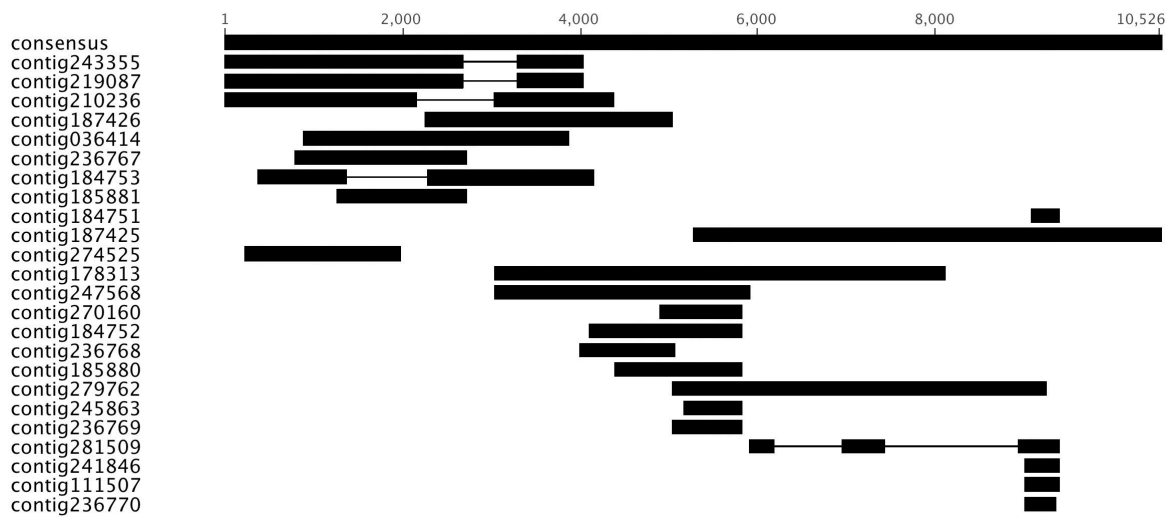

**Figure S1.** Schematic mapping of CoEFV fragments identified in this study onto the CoeEFV consensus genome.
